# Supplementary material for: Brain structural differences between fibromyalgia patients and healthy control subjects: a source-based morphometric study
Source: Springer Nature journal article supplement (doi:10.1038/s41598-025-01070-7), 2025-05-20
Supplement: MOESM1 [file 41598_2025_1070_MOESM1_ESM.pdf]

Supplementary Material

**Brain Structural Differences Between Fibromyalgia Patients and Healthy Control Subjects: A Source-Based Morphometric Study.**

Elijah Agoalikum<sup>12\*</sup>, Hongzhou Wu<sup>12</sup>, Benjamin Klugah-Brown<sup>3</sup>, Michael Maes<sup>12\*</sup>

1 Sichuan Provincial Center for Mental Health, Sichuan Provincial People's Hospital,  
School of Medicine, University of Electronic Science and Technology of China,  
Chengdu 610072, China

2 Key Laboratory of Psychosomatic Medicine, Chinese Academy of Medical Sciences,  
Chengdu 610072, China.

3 The Clinical Hospital of Chengdu Brain Science Institute, MOE Key Laboratory for  
Neuroinformation, School of Life Science and Technology, University of Electronic Science  
and Technology of China, No.2006, Xiyuan Avenue, West Hi-Tech Zone, Chengdu, Sichuan  
611731, China.

\*Correspondence:

Elijah Agoalikum  
agoalikumelijah@gmail.com

Michael Maes  
dr.michaelmaes@hotmail.com

Address: Sichuan Provincial Center for Mental Health, Sichuan Provincial People's Hospital,  
School of Medicine, University of Electronic Science and Technology of China, Chengdu  
610072, China.

Telephone: +8619381980441

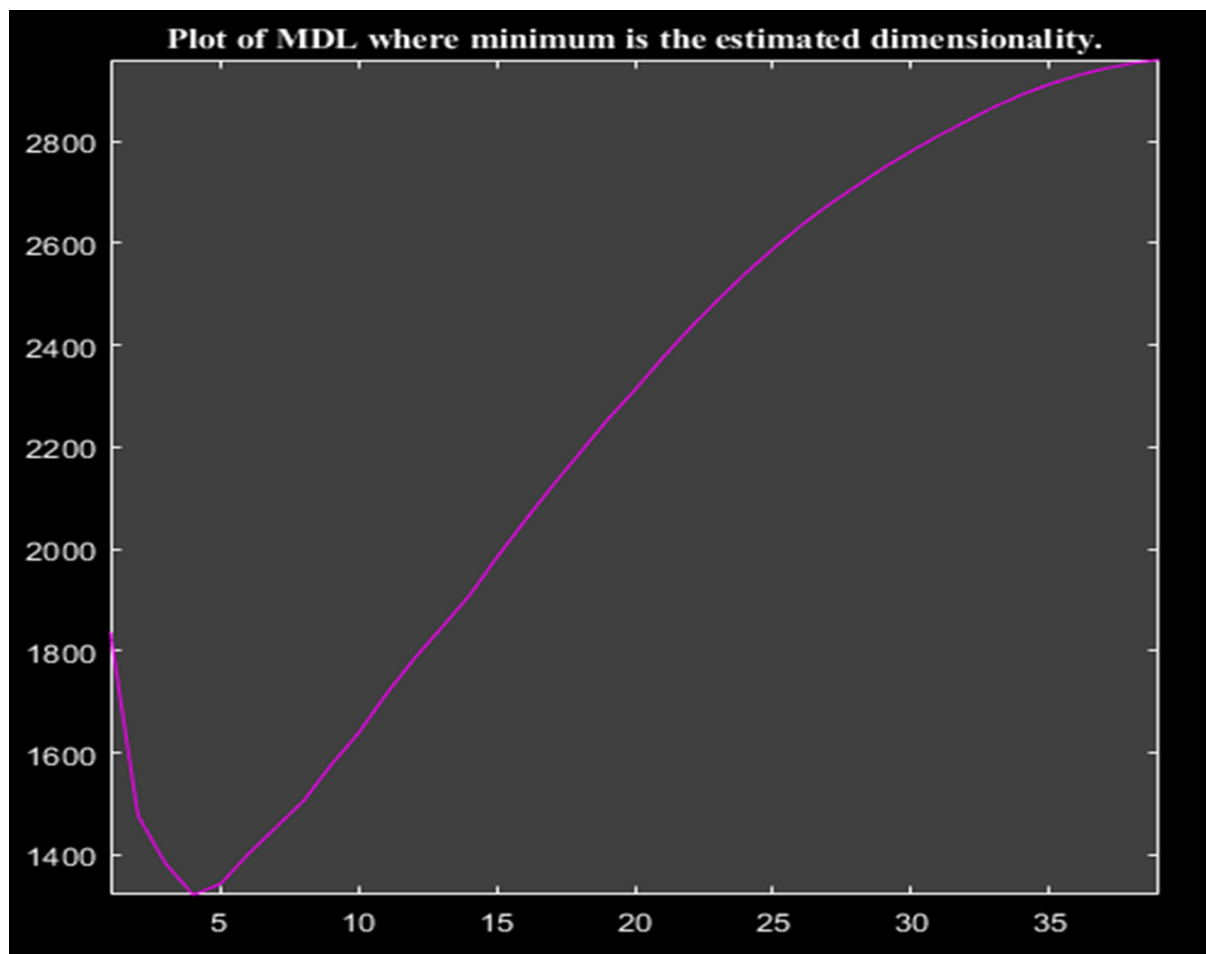

Supplementary Figure 1: The estimated independent components were identified to be 4 using the Minimum Description Length (MDL) criterion.

Supplementary Table 1: Brain regions showing GMV differences between FM patients compared and HC subjects in the significant component 4.

| Brain Region  | MNI Coordinates | GMV alteration |
|---------------|-----------------|----------------|
| Thalamus_L    | -9 -17 11       | greater        |
| Thalamus_R    | 10 -13 11       | greater        |
| Cerebelum_6_R | 33 -42 -29      | lower          |
| Putamen_R     | 30 0 -3         | lower          |
| Putamen_L     | -32 -6 -5       | lower          |
| Pallidum_R    | 24 3 1          | lower          |
| Pallidum_L    | -25 -1 -2       | lower          |
| Insula_R      | 40 -5 -5        | lower          |
| Insula_L      | -36 -6 -5       | lower          |
| Amygdala_R    | 24 3 -12        | lower          |
| Hippocampus_R | 24 -2 -19       | lower          |
| Calcarine_R   | 21 -69 9        | lower          |

L = Left; R = Right; MNI = Montreal Neurological Institute; GMV = Grey Matter Volume.

Supplementary Table 2: Brain regions showing GMV differences between FM patients compared and HC subjects in the insignificant component 1.

| Brain Region  | MNI Coordinates | GMV alteration |
|---------------|-----------------|----------------|
| Cerebelum_8_L | -20 -60 -54     | greater        |
| Cerebelum_8_R | 19 -58 -51      | greater        |
| Cerebelum_6_R | 21 -65 -21      | greater        |
| Cerebelum_6_L | -18 -65 -20     | greater        |

L = Left; R = Right; MNI = Montreal Neurological Institute; GMV = Grey Matter Volume.

Supplementary Table 3: Brain regions showing GMV differences between FM patients compared and HC subjects in the insignificant component 2.

| Brain Region | MNI Coordinates | GMV alteration |
|--------------|-----------------|----------------|
| Thalamus_R   | 8 -17 9         | greater        |
| Thalamus_L   | -7 -18 9        | greater        |

L = Left; R = Right; MNI = Montreal Neurological Institute; GMV = Grey Matter Volume.

Supplementary Table 4: Brain regions showing GMV differences between FM patients compared and HC subjects in the insignificant component 3.

| Brain Region        | MNI Coordinates | GMV alteration |
|---------------------|-----------------|----------------|
| Temporal_Pole_Mid_R | 40 17 -38       | greater        |
| Temporal_Pole_Mid_L | -42 17 -33      | greater        |
| Hippocampus_R       | 27 -11 -21      | greater        |
| Putamen_L           | -29 2 -3        | greater        |
| Fusiform_R          | 29 -6 -40       | greater        |
| Temporal_Inf_L      | -53 -12 -35     | greater        |
| Cerebelum_8_R       | 39 -47 -47      | lower          |
| Cerebelum_6_R       | 36 -53 -29      | lower          |

L = Left; R = Right; Mid = Middle; Inf = Inferior; MNI = Montreal Neurological Institute; GMV = Grey Matter Volume.

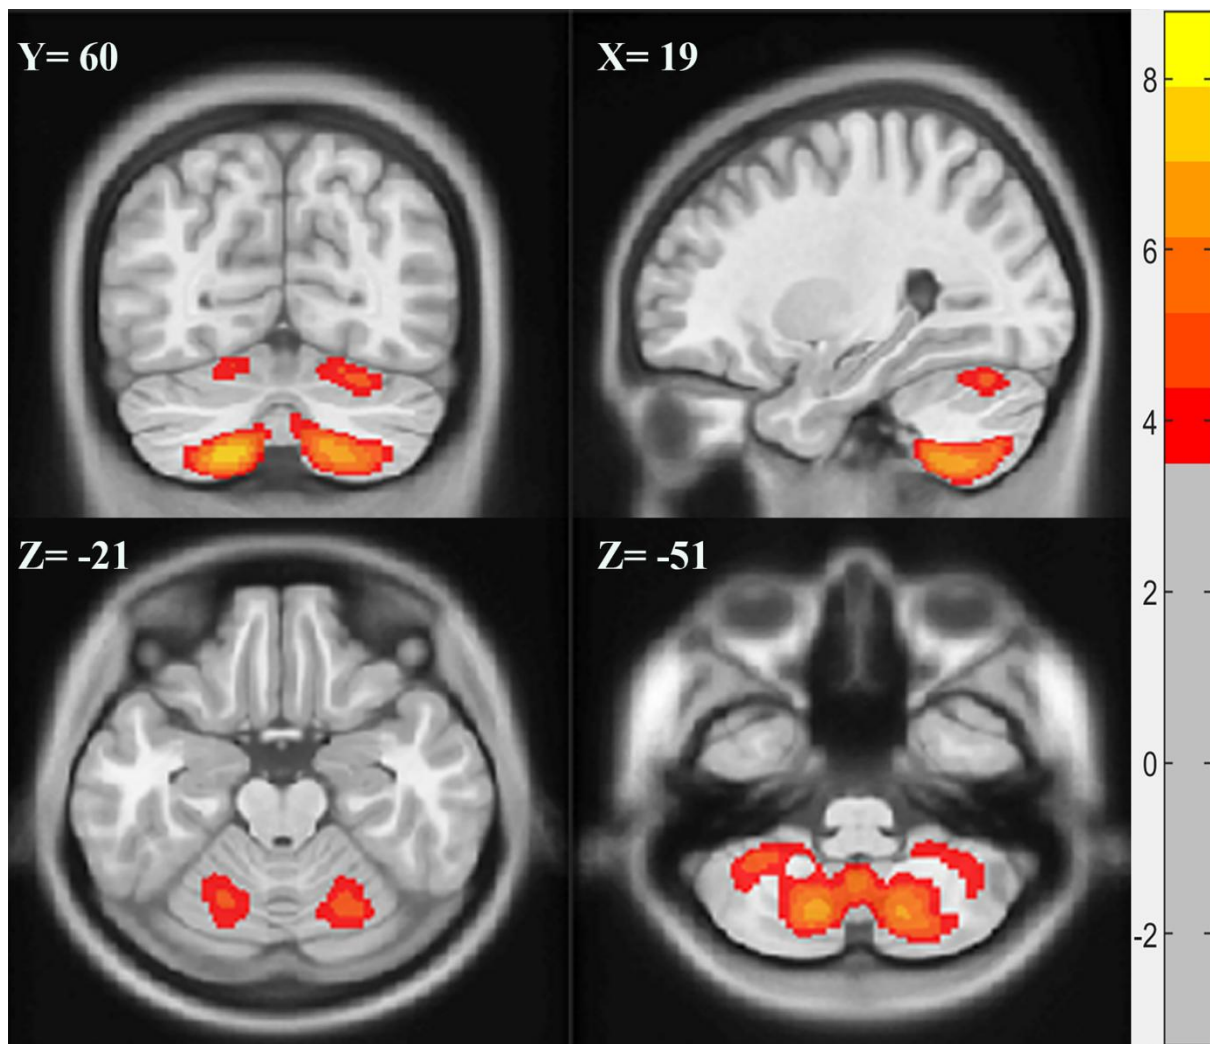

Supplementary Figure 2: Spatial maps of component 1 showing GMV differences between FM patients and HC subjects. FM patients showed greater GMV in this insignificant component than HC subjects. Spatial maps were shown with a threshold of  $|Z| > 3$ . GMV = Grey Matter Volume; FM = Fibromyalgia; HC = Healthy Control.

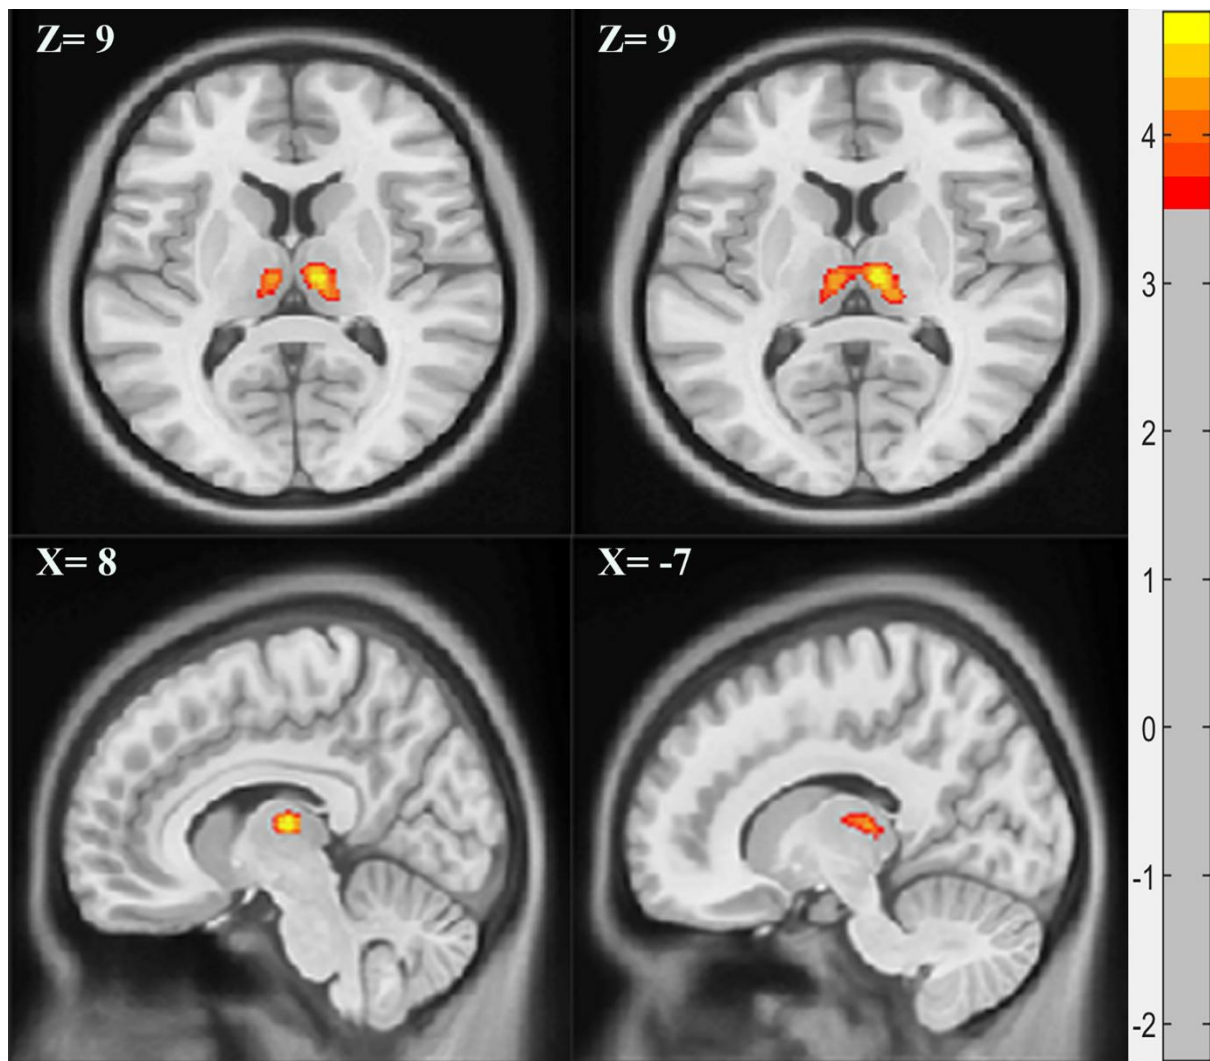

Supplementary Figure 3: Spatial maps of component 2 showing GMV differences between FM patients and HC subjects. FM patients showed greater GMV in this insignificant component than HC subjects. Spatial maps were shown with a threshold of  $|Z| > 3$ . GMV = Grey Matter Volume; FM = Fibromyalgia; HC = Healthy Control.

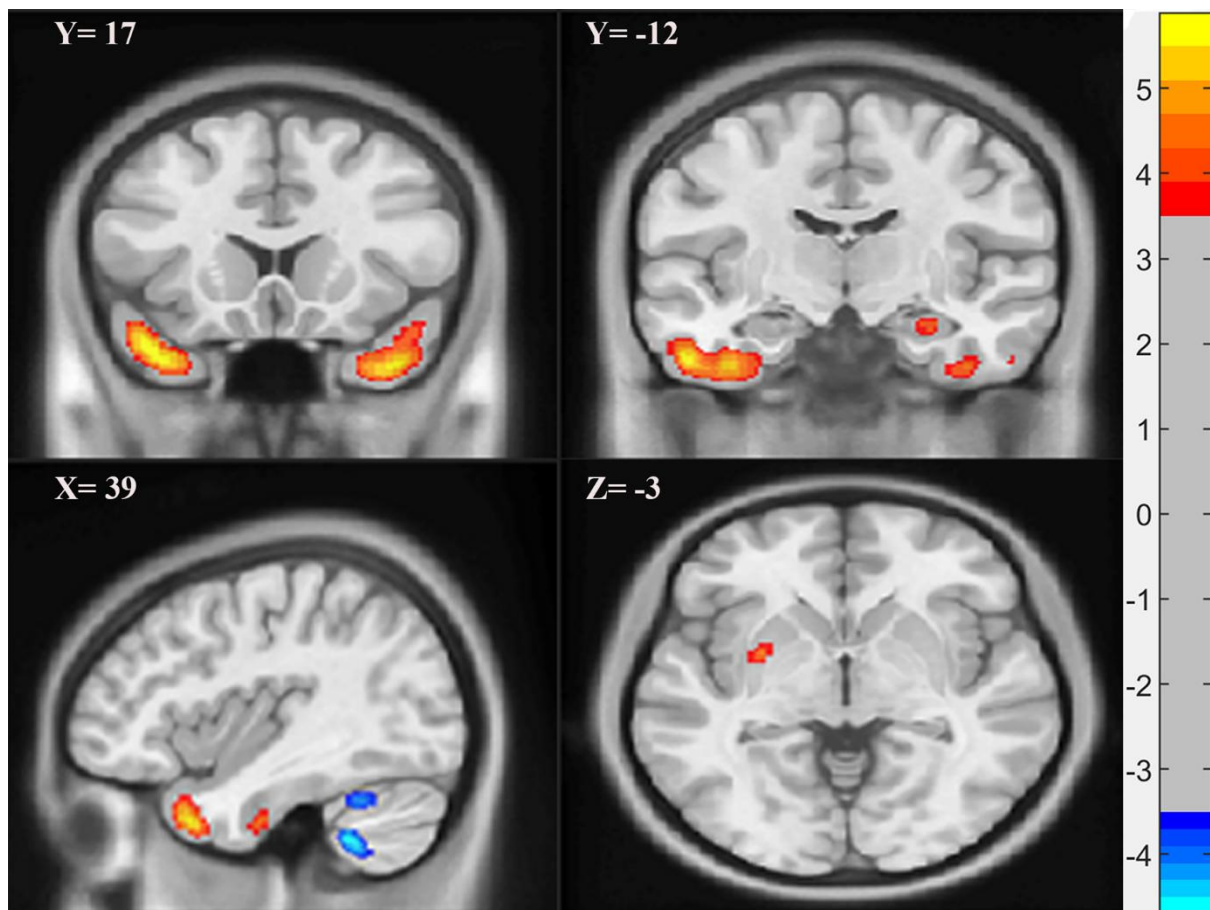

Supplementary Figure 4: Spatial maps of the insignificant component 3 showing GMV differences between FM patients and HC subjects. Hot (Red) colour represents greater GMV in FM and blue colour represents lower GMV in FM. Spatial maps were shown with a threshold of  $|Z| > 3$ . GMV = Grey Matter Volume; FM = Fibromyalgia; HC = Healthy Control.
